# Supplementary material for: Evolution of Salmonella enterica serotype Typhimurium driven by anthropogenic selection and niche adaptation
Source: bioRxiv or medRxiv preprint supplement (doi:10.1101/804674), 2019-12-02

Supplementary Figure 2

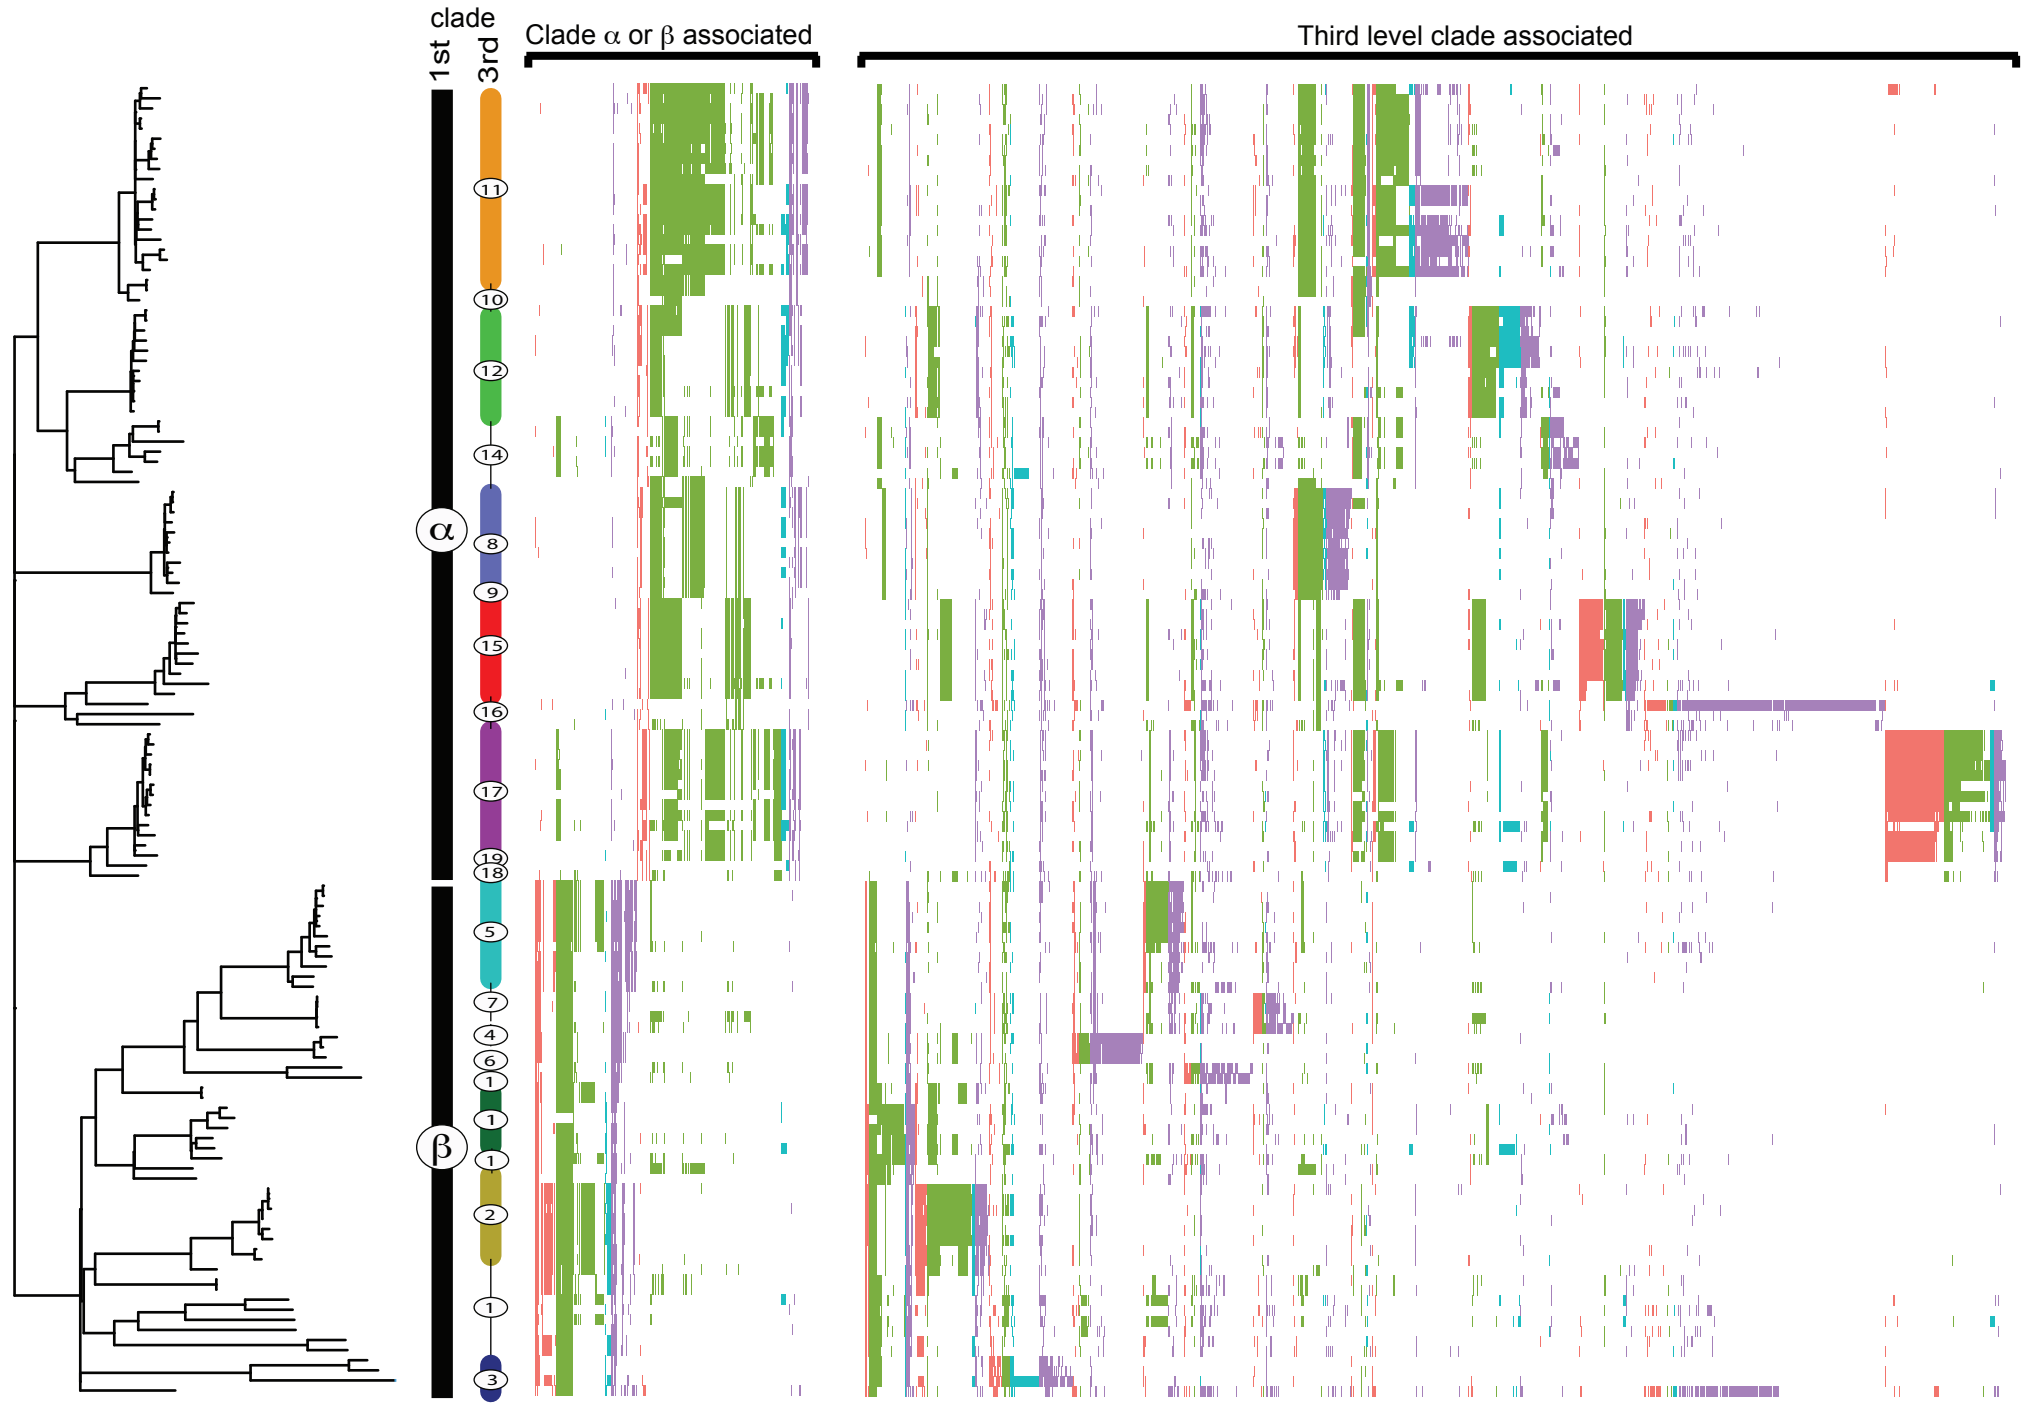

Supplement: Supplementary file [file media-2.pdf]
